# Supplementary material for: Fecal Microbiota Dynamics During Disease Activity and Remission in Newly Diagnosed and Established Ulcerative Colitis
Source: Research Square preprint supplement (doi:10.21203/rs.3.rs-134029/v1), 2021-01-04
Supplement: Supplementary file 2 [file 71e7483f7ac054ed7d5e5101.docx]

**Fecal microbiota dynamics during disease activity and remission in newly diagnosed and established ulcerative colitis**

Lena Öhman1,2, Anders Lasson3, Anna Strömbeck1, Stefan Isaksson1, Marcus Hesselmar2, Magnus Simrén2,4, Hans Strid3 and Maria K Magnusson1.

*1University of Gothenburg,Inst. for Biomedicine, Sahlgrenska Academy,Dept. of Microbiology and Immunology, Gothenburg, Sweden, 2University of Gothenburg,Inst. for Medicine, Sahlgrenska Academy,Dept. of Internal Medicine and Clinical Nutrition, Gothenburg, Sweden and 3Dept. of Internal Medicine, Södra Älvsborg Hospital, Borås, Sweden, 4Center for Functional Gastrointestinal and Motility Disorders, University of North Carolina at Chapel Hill, Chapel Hill, North Carolina.*

**Supplementary Table S1.** List of the 54 probes included in GA-map™ Dysbiosis Test; bacteria names and taxonomy.

| **Phylum** | **Class** | **Genus/Species** |
| --- | --- | --- |
| Actinobacteria | Actinobacteria | Actinobacteria |
| Actinobacteria | Actinopbacteria | Actinomycetales |
| Actinobacteria | Corinobacteria | *Atopobium rimae* |
| Actinobacteria | Actinobacteria | *Bifidobacterium* spp. |
| Bacteroidetes | Alistipes | *Alistipes* |
| Bacteroidetes | Alistipes | *Alistipes onderdonkii* |
| Bacteroidetes | Bacteroides | *Bacteroides fragilis* |
| Bacteroidetes | Bacteroides | *Bacteroides pectinophilus* |
| Bacteroidetes | Bacteroides | *Bacteroide*s spp. |
| Bacteroidetes | Bacteroides | *Bacteroides* spp. & *Prevotell*a spp. |
| Bacteroidetes | Bacteroides | *Bacteroides stercoris* |
| Bacteroidetes | Bacteroides | *Bacteroides zoogleoformans* |
| Bacteroidetes | Parabacterioides | *Parabacteroides johnsonii* |
| Bacteroidetes | Parabacterioides | *Parabacteroides* spp. |
| Bacteroidetes | Prevotella | *Prevotella nigrescens* |
| Firmicutes | Negativicutes/Clostridia | Firmicutes |
| Firmicutes | Clostridia | *Anaerotruncus colihominis* |
| Firmicutes | Bacilli | Bacilli |
| Firmicutes | Bacilli | *Bacillus megaterium* |
| Firmicutes | Erysipelotrichia | *Catenibacterium mitsuokai* |
| Firmicutes | Clostridia | Clostridia |
| Firmicutes | Ruminiclostridium | *Clostridium methylpentosum* |
| Firmicutes | Clostridia | *Clostridium* sp. |
| Firmicutes | Erysipelotrichia | *Coprobacillus cateniformis* |
| Firmicutes | Clostridia | *Desulfitispora alkaliphila* |
| Firmicutes | Negativicutes | *Dialister invisus* |
| Firmicutes | Negativicutes | *Dialister invisus* & *Megasphaera micronuciformis* |
| Firmicutes | Clostridia | *Dorea* spp. |
| Firmicutes | Clostridia | *Eubacterium biforme* |
| Firmicutes | Clostridia | *Eubacterium hallii* |
| Firmicutes | Clostridia | *Eubacterium rectale* |
| Firmicutes | Clostridia | *Eubacterium siraeum* |
| Firmicutes | Clostridia | *Faecalibacterium prausnitzii* |
| Firmicutes | Clostridia | Lachnospiraceae |
| Firmicutes | Bacilli | *Lactobacillus ruminis* & *Pediococcus acidilactici* |
| Firmicutes | Bacilli | *Lactobacillus* spp. |
| Firmicutes | Bacilli | *Lactobacillus* spp. 2 |
| Firmicutes | Negativicutes | *Phascolarctobacterium* sp. |
| Firmicutes | Clostridia | Ruminococcus albus & R. bromii |
| Firmicutes | Clostridia | *Ruminococcus gnavus* |
| Firmicutes | Bacilli | *Streptococcus agalactiae* & *Eubacterium rectale* |
| Firmicutes | Bacilli | *Streptococcus salivarius* ssp. *thermophilus* & S. *sanguinis* |
| Firmicutes | Bacilli | *Streptococcus salivarius* ssp.*thermophilus* |
| Firmicutes | Bacilli | *Streptococcus* spp. |
| Firmicutes | Bacilli | *Streptococcus* spp. 2 |
| Firmicutes | Negativicutes | *Veillonella* spp. |
| Firmicutes/Tenericutes/Bacteroidetes species |  | Firmicutes (various) |
| Proteobacteria | Proteobacteria | Proteobacteria |
| Proteobacteria | Gammaproteobacteria | *Acinetobacter junii* |
| Proteobacteria | Gammaproteobacteria | Enterobacteriaceae |
| Proteobacteria | Gammaproteobacteria | *Pseudomonas* spp. |
| Proteobacteria | Gammaproteobacteria | *Shigella* spp. & *Escherichia* spp. |
| Tenericutes | Mollicutes | *Mycoplasma hominis* |
| Verrucomicrobia | Verrumicrobiae | *Akkermansia muciniphila* |
